# Supplementary material for: Development and Validation of a UPLC-MS/MS Method for the Quantification of Components in the Ancient Classical Chinese Medicine Formula of Guyinjian
Source: MDPI journal article supplement (doi:10.3390/molecules27238611), 2022-12-06
Supplement: s1 [file s1]

## Supplementary materials

**Figure S1:** Results of method specificity examination. Rehmannioside D (A), Morroniside (B), Loganin (C), Polygalaxanthone III (D), Liquiritin (E), Hyperoside (F), Verbascoside (G), 3',6-Disinapoylsucrose (H), Ginsenoside Re (I), Ginsenoside Rg1 (J), Ginsenoside Rb1 (K), Tenuifolin (L), Glycyrrhizic acid (M), Schisandrin (N).

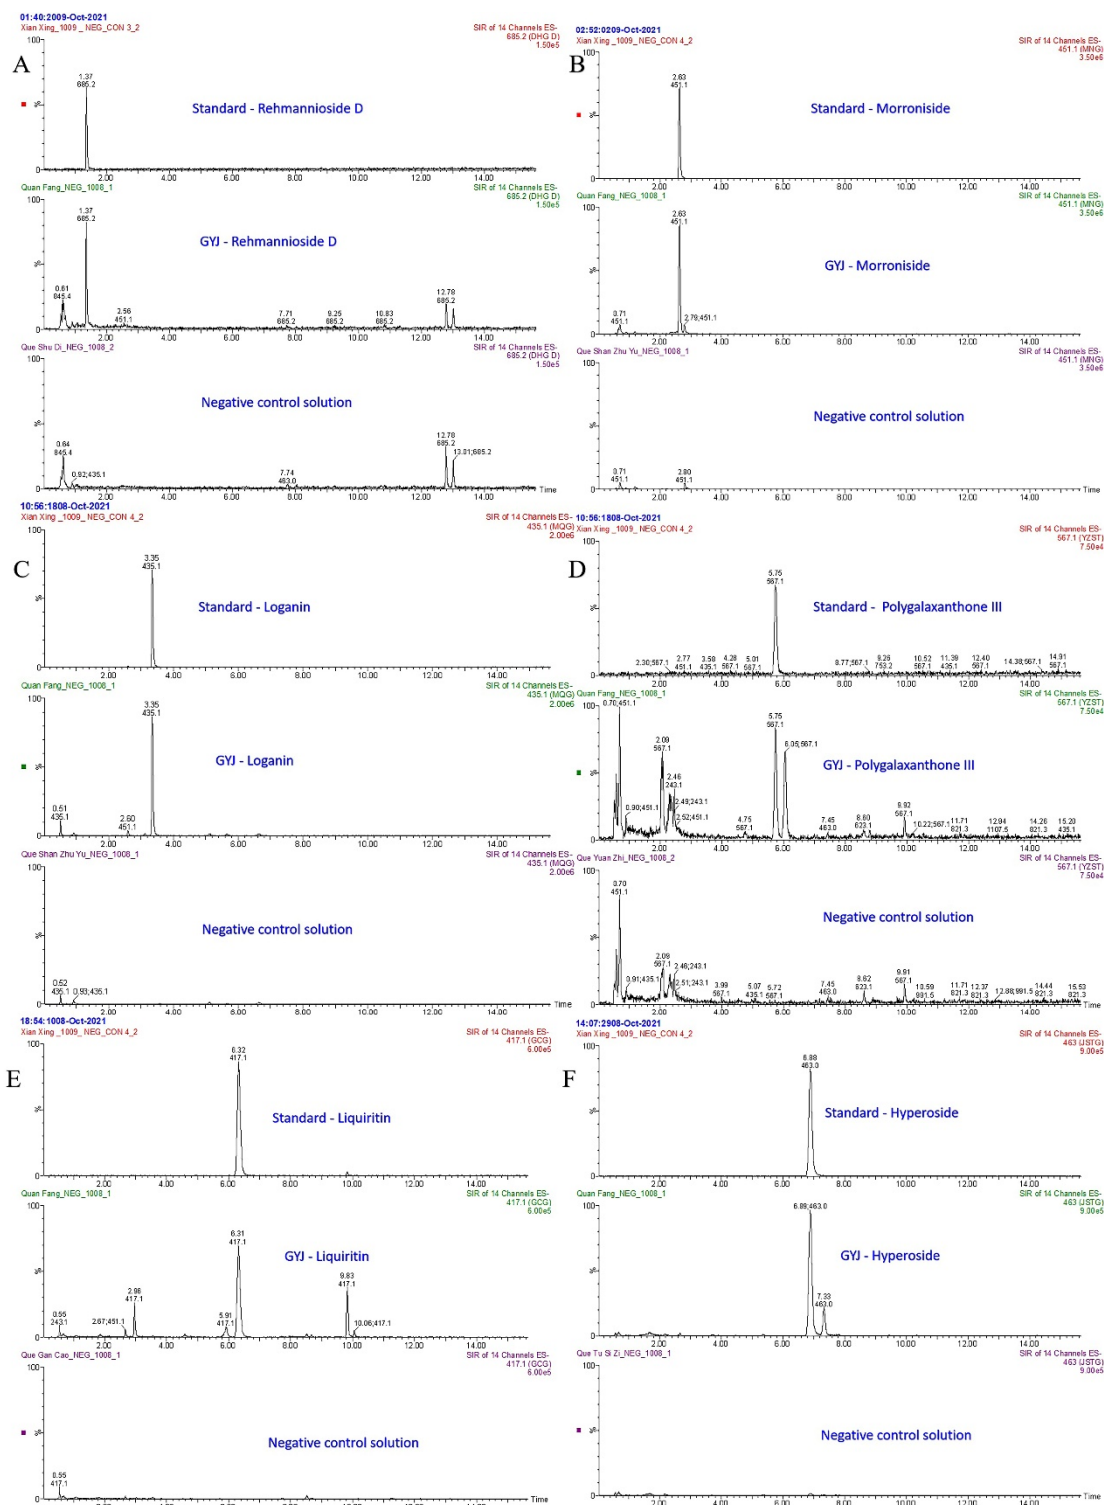

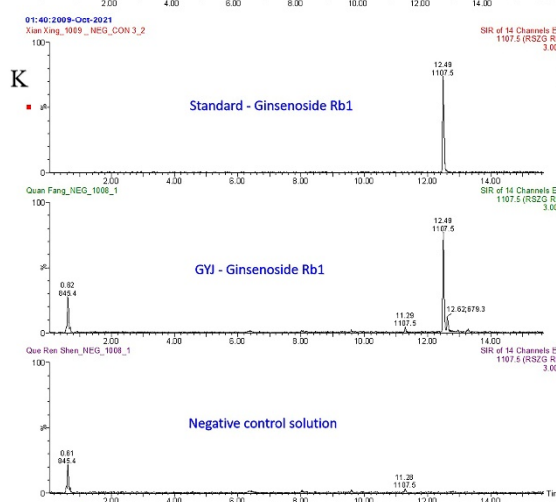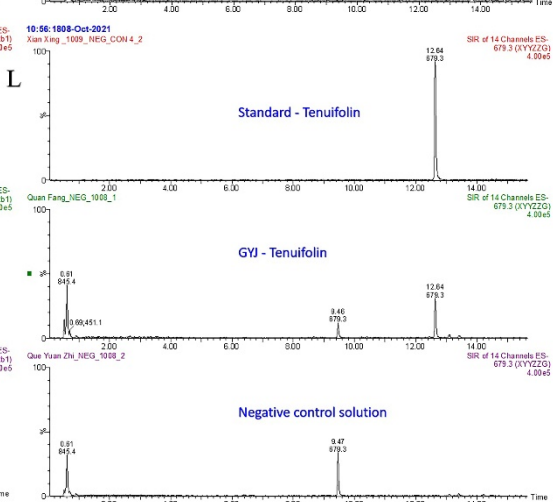

18:54:1008-Oct-2021  
Xian.Xing\_1009\_NEG\_CON\_4\_2

M

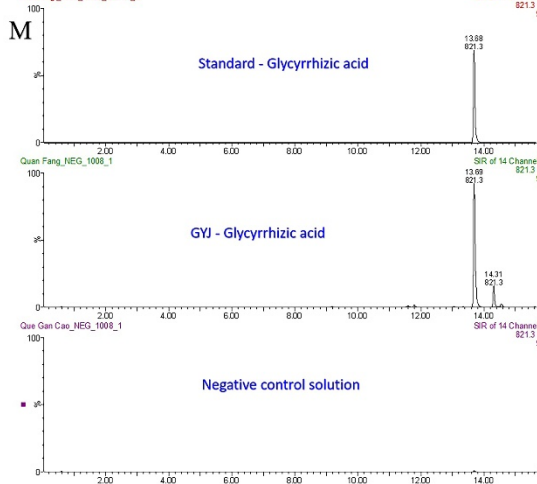

Hurdiao-POS\_WWZCJ-3 xiaoh20bei

N

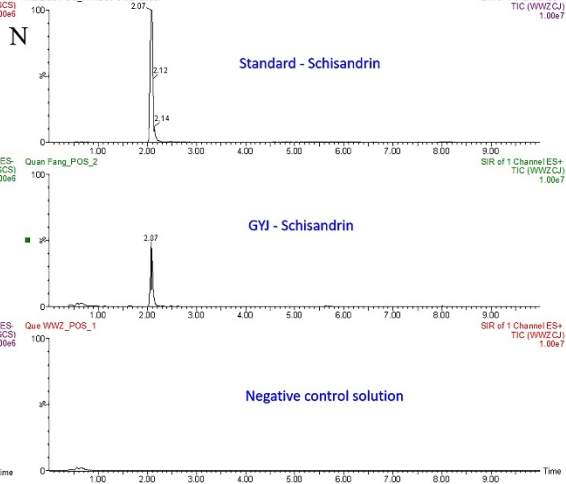

Quan Fang\_NEG\_1008\_1

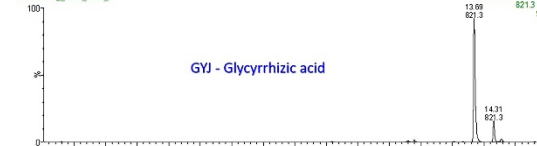

Quan Fang\_POS\_2

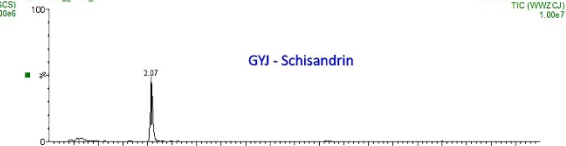

Que Gan Cao\_NEG\_1008\_1

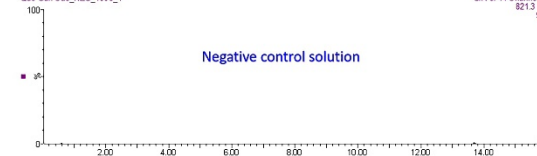

Que WWZ\_POS\_1

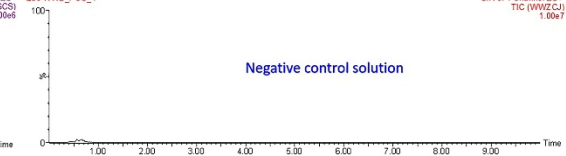

**Table S1:** Information of standard products.

| Compound               | Molecular Formula                               | Molecular Weight | Purity   | Supplier                                      | Batch number  | CAS         |
|------------------------|-------------------------------------------------|------------------|----------|-----------------------------------------------|---------------|-------------|
| Rehmannioside D        | C <sub>27</sub> H <sub>42</sub> O <sub>20</sub> | 686.610          | 98.30%   | Chengdu Purfield Biotechnology Co., Ltd.      | 20050703      | 81720-08-3  |
| Morroniside            | C <sub>17</sub> H <sub>26</sub> O <sub>11</sub> | 406.382          | HPLC>98% | Chengdu Refensi Biotechnology Co., Ltd.       | M-027-161226  | 25406-64-8  |
| Loganin                | C <sub>17</sub> H <sub>26</sub> O <sub>10</sub> | 390.382          | 99.20%   | National Institutes for Food and Drug Control | 111640-201707 | 18524-94-2  |
| Polygalaxanthone III   | C <sub>25</sub> H <sub>28</sub> O <sub>15</sub> | 568.481          | 96.50%   | National Institutes for Food and Drug Control | 111850-201705 | 162857-78-5 |
| Liquiritin             | C <sub>21</sub> H <sub>22</sub> O <sub>9</sub>  | 418.39           | 95.00%   | National Institutes for Food and Drug Control | 111610-201908 | 551-15-5    |
| Hyperoside             | C <sub>21</sub> H <sub>20</sub> O <sub>12</sub> | 464.376          | 94.90%   | National Institutes for Food and Drug Control | 111521-201809 | 482-36-0    |
| Verbascoside           | C <sub>29</sub> H <sub>36</sub> O <sub>15</sub> | 624.587          | HPLC>98% | Chengdu Refensi Biotechnology Co., Ltd.       | M-011-170629  | 61276-17-3  |
| 3',6-Disinapoylsucrose | C <sub>34</sub> H <sub>42</sub> O <sub>19</sub> | 754.686          | HPLC>95% | Chengdu Refensi Biotechnology Co., Ltd.       | F-013-170426  | 139891-98-8 |
| Ginsenoside Re         | C <sub>48</sub> H <sub>82</sub> O <sub>18</sub> | 947.154          | 93.40%   | National Institutes for Food and Drug Control | 110754-201827 | 51542-56-4  |
| Ginsenoside Rg1        | C <sub>42</sub> H <sub>72</sub> O <sub>14</sub> | 801.013          | 92.40%   | National Institutes for Food and Drug Control | 110703-201832 | 22427-39-0  |
| Ginsenoside Rb1        | C <sub>54</sub> H <sub>92</sub> O <sub>23</sub> | 1109.295         | 91.20%   | National Institutes for Food and Drug Control | 110704-201827 | 41753-43-9  |
| Tenuifolin             | C <sub>36</sub> H <sub>56</sub> O <sub>12</sub> | 680.823          | 91.60%   | National Institutes for Food and Drug Control | 111849-201705 | 20183-47-5  |
| Glycyrrhizic acid      | C <sub>42</sub> H <sub>62</sub> O <sub>16</sub> | 822.932          | HPLC>98% | Sichuan Vikki Biotechnology Co., Ltd.         | 201005        | 1405-86-3   |
| Schisandrin            | C <sub>24</sub> H <sub>32</sub> O <sub>7</sub>  | 432.507          | 99.90%   | National Institutes for Food and Drug Control | 110857-201714 | 7432-28-2   |
